# Supplementary material for: Genetic basis and evolution of rapid cycling in railway populations of tetraploid Arabidopsis arenosa
Source: PubMed Central journal article supplement (PMC6049958; doi:10.1371/journal.pgen.1007510), 2018-07-05
Supplement: pgen.1007510.s003.pdf [file pgen.1007510.s003.pdf]

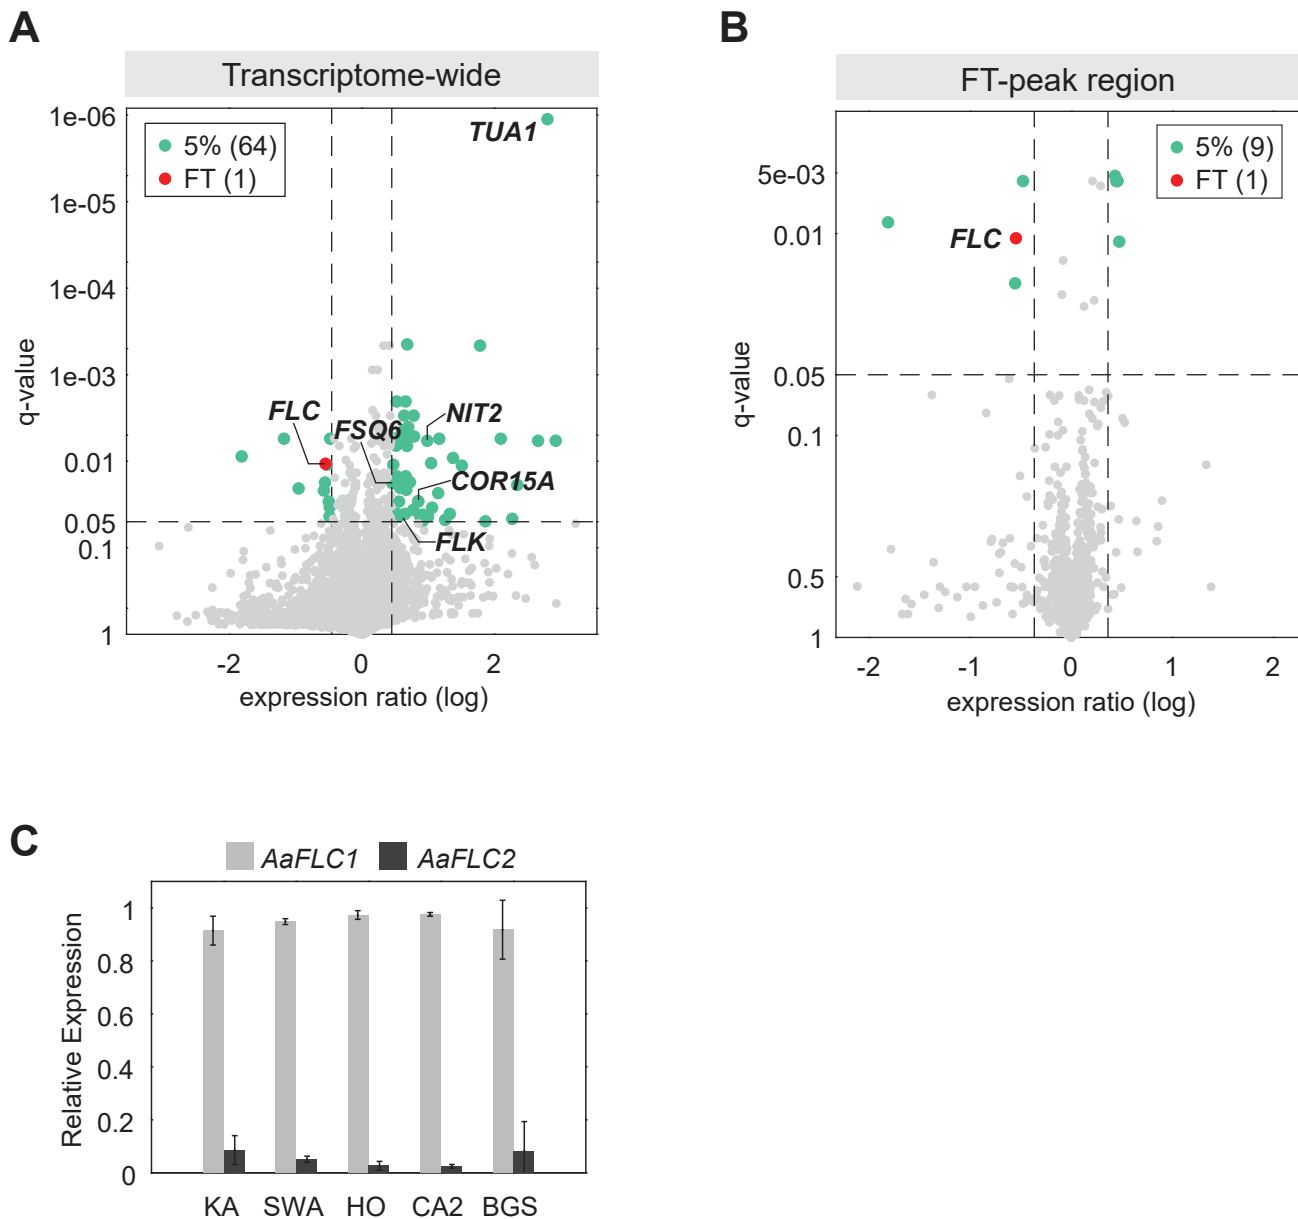

**Figure S1.** Differential expression between railway and mountain accessions.

(A) Volcano plots of differential expression (q-value) against log expression ratios between railway and mountain accessions (excluding BGS) within whole transcriptome. 5% most differentially expressed (two-tailed log-ratio) are highlighted in green and within these, flowering-time genes (FT) are in red. (B) Volcano plots of differential expression (q-value) against log expression ratios between railway and mountain accessions (excluding BGS) within FT-peak region. 5% most differentially expressed (two-tailed log-ratio) are highlighted in green and within these, flowering-time genes (FT) are in red. (C) Parologue-specific *FLC* expression: relative expression of *AaFLC1* (light grey) and *AaFLC2* (dark grey) across mountain populations and BGS.
