# Supplementary material for: Genetic basis and evolution of rapid cycling in railway populations of tetraploid Arabidopsis arenosa
Source: PubMed Central journal article supplement (PMC6049958; doi:10.1371/journal.pgen.1007510), 2018-07-05
Supplement: pgen.1007510.s008.pdf [file pgen.1007510.s008.pdf]

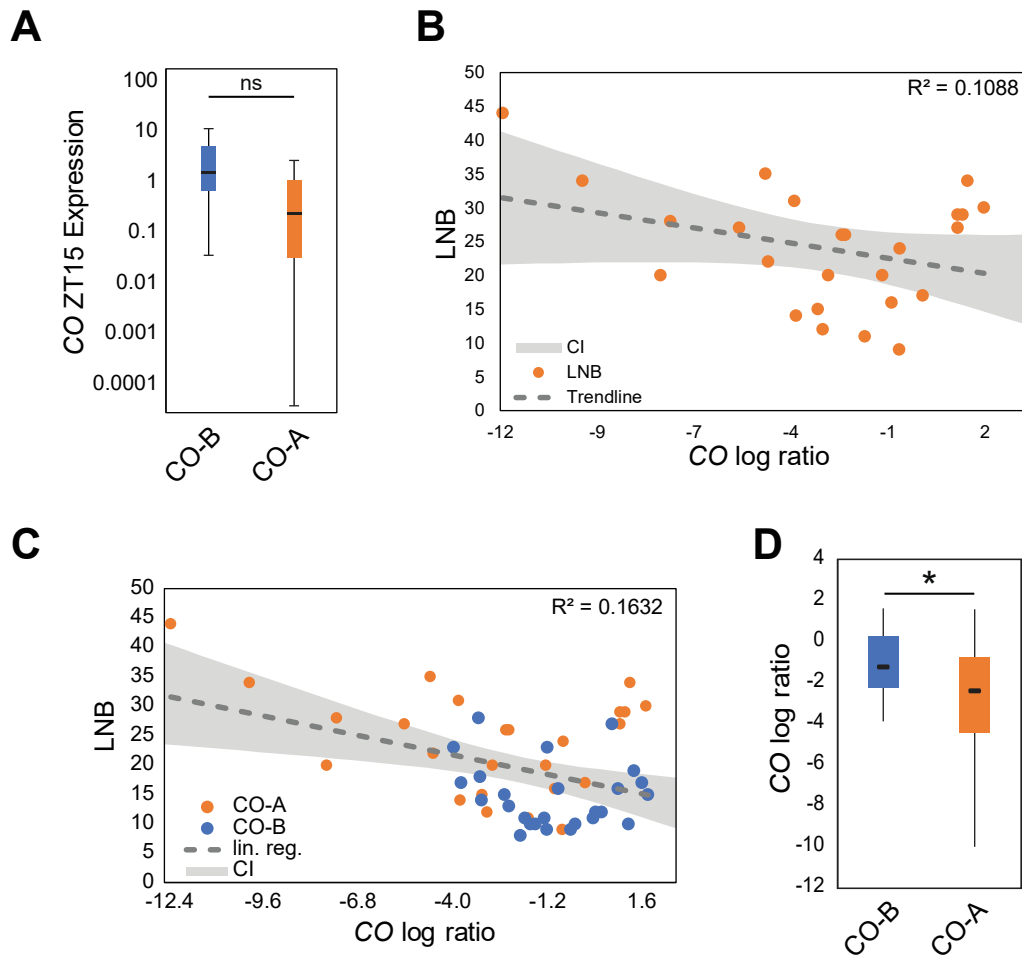

**Figure S6.** CO expression in CO-A and CO-B transgenic lines.

(A) Normalized CO expression at ZT15 of CO-A (orange) and CO-B (blue) T1s. (B-C) Correlations between flowering time, measured as leaves number at bolting (LNB), and CO log ratio of ZT8 over ZT15 expression in transgenic T1 lines for CO-A only (B) and both transgenes (C). The regression line is represented in dotted line surrounded by the confidence intervals (shaded area). (D) Comparison of the distribution of CO log-ratios between CO-A (orange) and CO-B (blue) T1s. (\* =  $p < 0.05$ )
