# Supplementary material for: Genetic basis and evolution of rapid cycling in railway populations of tetraploid Arabidopsis arenosa
Source: PLOS journal article supplement (doi:10.1371/journal.pgen.1007510), 2018-07-05
Supplement: S5 (10.1371/journal.pgen.1007510.s005) [file journal.pgen.1007510.s005]

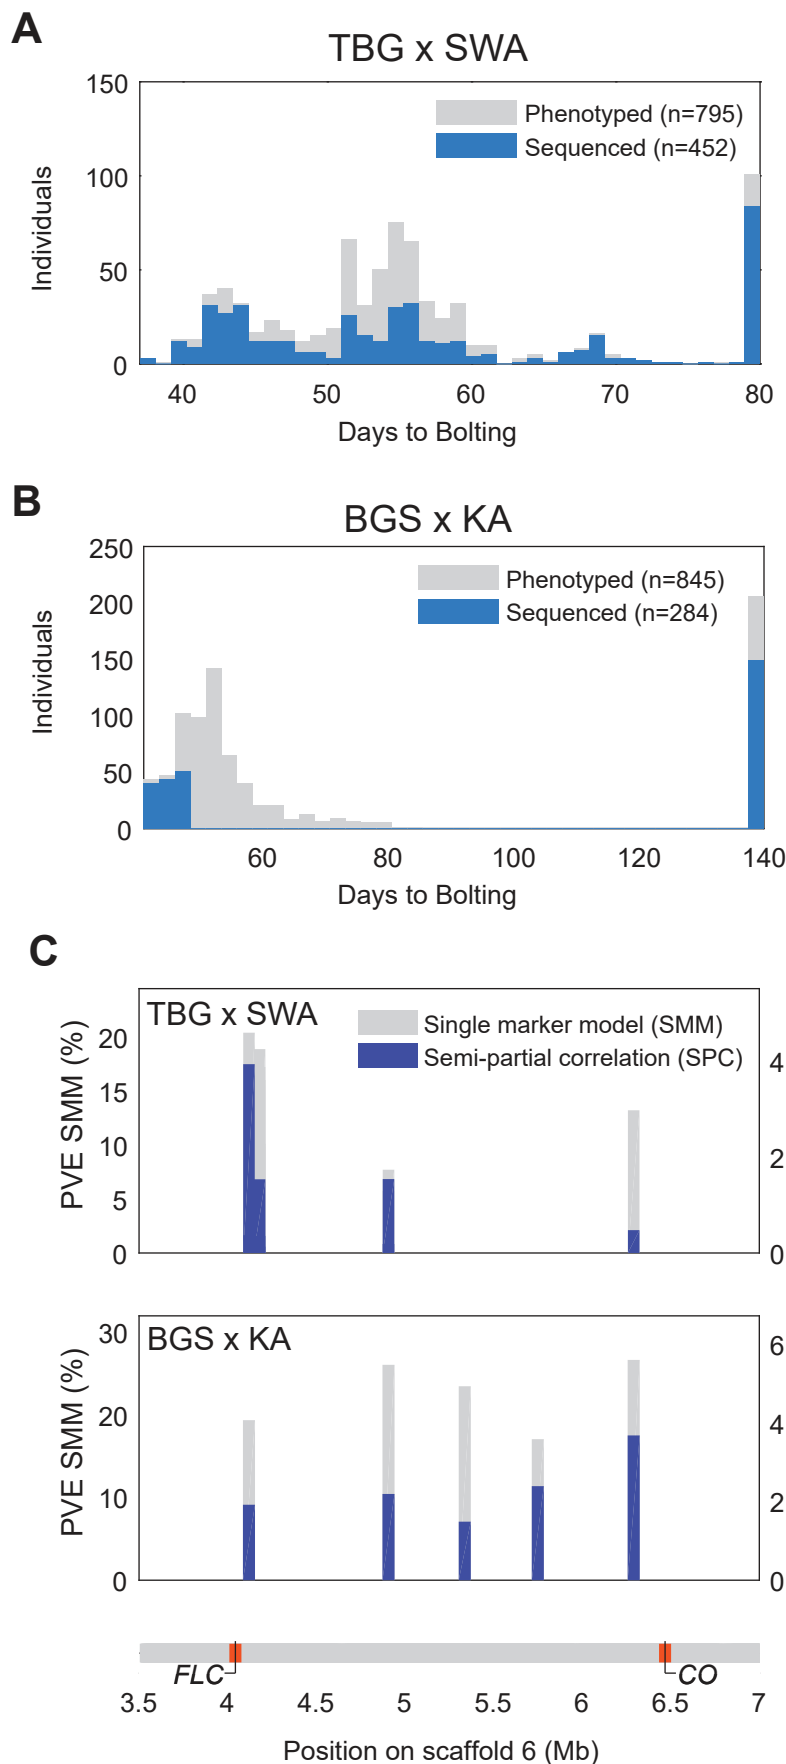

**Figure S3.** Phenotypic distribution of flowering time and PVE distribution across the *FLC-CO* region in TBG x SWA and BGS x KA F2s

(A, B) Distribution of flowering time (Days to Bolting) in phenotyped (grey) and sequenced (blue) in TBG x SWA (A) and BGS x KA (B) F2 individuals. (C) Distribution of percentages of variance explained (PVE) across the *FLC-CO* region in TBG x SWA and BGS x KA. PVE distributions are shown for each cross above the gene models for the region. Single marker model (SMM) percent variance explained (PVE) are plotted in grey on the primary (left) y-axis, while semi-partial correlation coefficients (SPC) from the multiple linear model are in blue against the secondary y-axis.
